# Supplementary material for: Replacing cyclophosphamide/cytarabine/mercaptopurine with cyclophosphamide/etoposide during consolidation/delayed intensification does not improve outcome for pediatric B-cell acute lymphoblastic leukemia: a report from the COG
Source: PubMed Central journal article supplement — Haematologica. 2018 Dec 13;104(5):986–92. doi: 10.3324/haematol.2018.204545 (PMC6518909; doi:10.3324/haematol.2018.204545), 2019-05

## Replacing cyclophosphamide/cytarabine/mercaptopurine with cyclophosphamide/etoposide during consolidation/delayed intensification does not improve outcome for pediatric B-cell acute lymphoblastic leukemia: a report from the COG

Michael J. Burke,<sup>1\*</sup> Wanda L. Salzer,<sup>2\*</sup> Meenakshi Devidas,<sup>3</sup> Yunfeng Dai,<sup>3</sup> Lia Gore,<sup>4</sup> Joanne M. Hilden,<sup>4</sup> Eric Larsen,<sup>5</sup> Karen R. Rabin,<sup>6</sup> Patrick A. Zweidler-McKay,<sup>7</sup> Michael J. Borowitz,<sup>8</sup> Brent Wood,<sup>9</sup> Nyla A. Heerema,<sup>10</sup> Andrew J. Carroll,<sup>11</sup> Naomi Winick,<sup>12</sup> William L. Carroll,<sup>13</sup> Elizabeth A. Raetz,<sup>13\*\*</sup> Mignon L. Loh<sup>14\*\*</sup> and Stephen P. Hunger<sup>15\*\*</sup>

<sup>1</sup>Department of Pediatrics, Children's Hospital of Wisconsin, Milwaukee, WI; <sup>2</sup>U.S. Army Medical Research and Materiel Command, Fort Detrick, MD; <sup>3</sup>Department of Biostatistics, Colleges of Medicine and Public Health & Health Professions, University of Florida, Gainesville, FL; <sup>4</sup>Department of Pediatrics, Center for Cancer and Blood Disorders, Children's Hospital Colorado and The University of Colorado School of Medicine, Aurora, CO; <sup>5</sup>Department of Pediatrics, Maine Children's Cancer Program, Scarborough, ME; <sup>6</sup>Department of Pediatrics, Baylor College of Medicine, Houston, TX; <sup>7</sup>ImmunoGen, Inc, Waltham, MA; <sup>8</sup>Department of Pathology, Johns Hopkins Medical Institutions, Baltimore, MD; <sup>9</sup>Department of Laboratory Medicine, University of Washington, Seattle, WA; <sup>10</sup>Department of Pathology, The Ohio State University School of Medicine, Columbus, OH; <sup>11</sup>Department of Genetics, University of Alabama at Birmingham, AL; <sup>12</sup>Department of Pediatrics, University of Texas Southwestern Medical Center, Dallas, TX; <sup>13</sup>Department of Pediatrics, Perlmutter Cancer Center, New York University Langone Health, New York, NY; <sup>14</sup>Department of Pediatrics, Benioff Children's Hospital and the Helen Diller Family Comprehensive Cancer Center, University of California at San Francisco, CA and <sup>15</sup>Department of Pediatrics, Children's Hospital of Philadelphia and the Perelman School of Medicine at the University of Pennsylvania, Philadelphia, PA, USA

\*These authors contributed equally as first authors.

\*\*These authors contributed equally as senior authors.

©2019 Ferrata Storti Foundation. This is an open-access paper. doi:10.3324/haematol.2018.204545

Received: August 20, 2018.

Accepted: December 6, 2018.

Pre-published: December 13, 2018.

Correspondence: MICHAEL J. BURKE [mmburke@mcw.edu](mailto:mmburke@mcw.edu)

**Supplemental Figure 1**

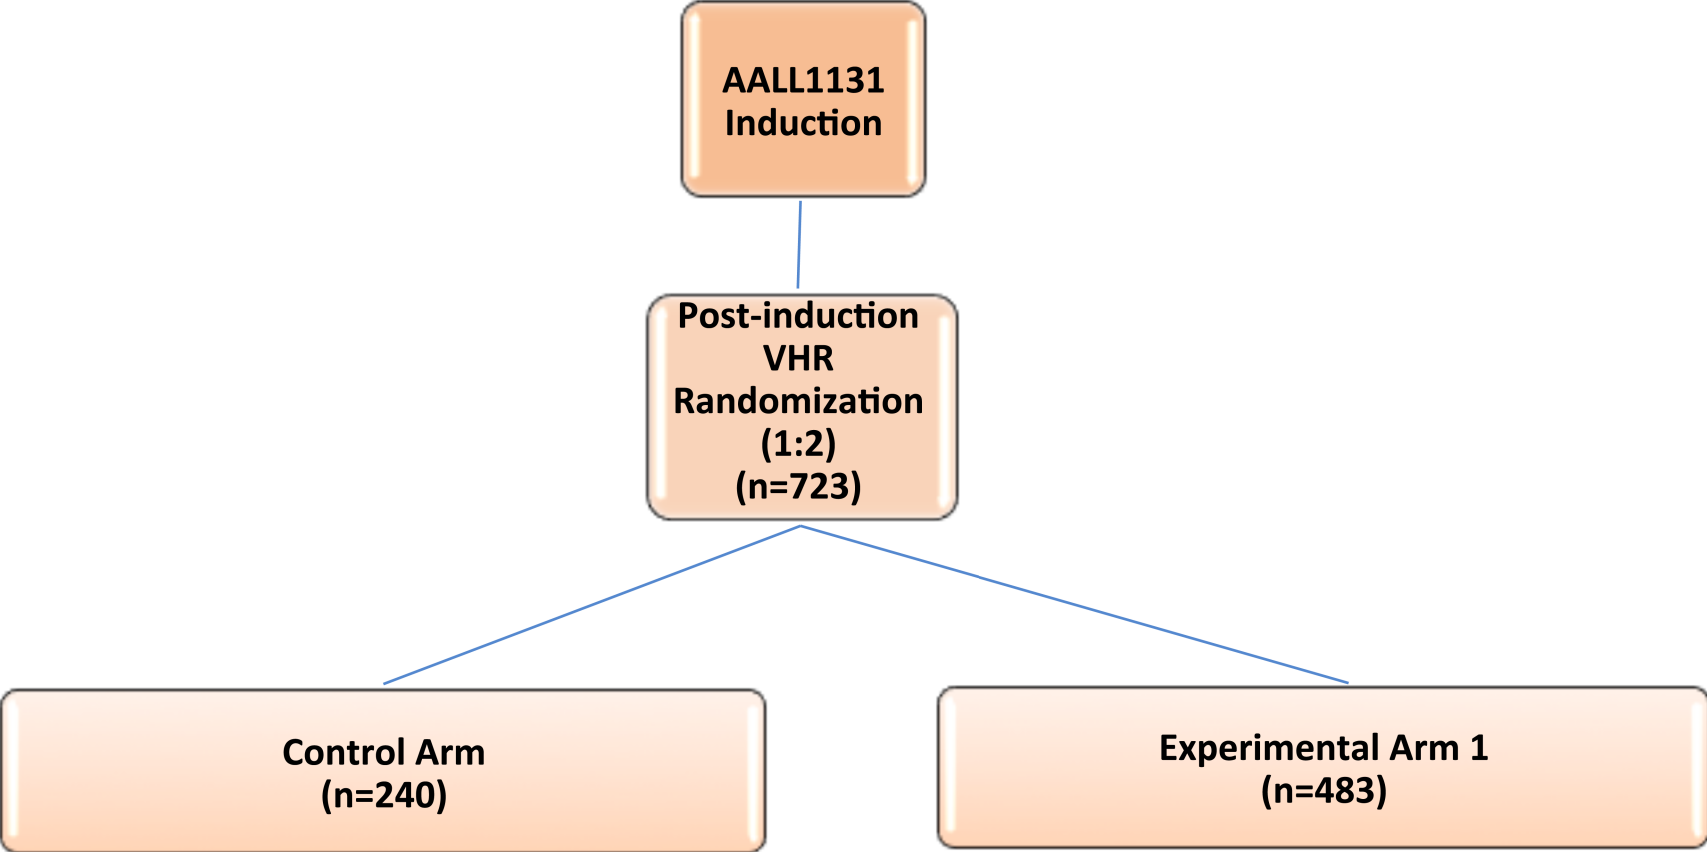

Supplement: 2018.204545.BURKE_SUPPL.pdf [file 2018.204545.BURKE_SUPPL.pdf]
