# Supplementary material for: Replacing cyclophosphamide/cytarabine/mercaptopurine with cyclophosphamide/etoposide during consolidation/delayed intensification does not improve outcome for pediatric B-cell acute lymphoblastic leukemia: a report from the COG
Source: PubMed Central journal article supplement — Haematologica. 2018 Dec 13;104(5):986–92. doi: 10.3324/haematol.2018.204545 (PMC6518909; doi:10.3324/haematol.2018.204545), 2019-05
Supplement: 2018_204545-Disclosures_and_Contributions.pdf [file 2018_204545-Disclosures_and_Contributions.pdf]

Haematologica  
HAEMATOL/2018/204545  
Version 3

Replacement of cyclophosphamide/cytarabine/mercaptopurine with  
cyclophosphamide /etoposide during Consolidation/Delayed  
Intensification does not improve outcome for pediatric B-ALL: a report  
from the COG

Michael J. Burke, Wanda L. Salzer, Meenakshi Devidas, Yunfeng Dai,  
Lia Gore, Joanne M. Hilden, Eric Larsen, Karen R. Rabin, Patrick A.  
Zweidler-McKay, Michael J. Borowitz, Brent Wood, Nyla A. Heerema,  
Andrew J. Carroll, Naomi Winick, William L. Carroll, Elizabeth A Raetz,  
Mignon L. Loh, and Stephen P. Hunger

Disclosures: M.J.B has received honoraria from Shire Pharmaceuticals, Jazz  
Pharmaceuticals and Amgen. S.P.H. has received honoraria from Jazz Pharmaceuticals  
and Erytech, and consulting fees from Novartis. K.R.R has received consulting fees from  
Adaptive Biotechnologies. L.G. has received consulting fees from Amgen, Bristol-Myers  
Squibb, Celgene, Novartis and Genentech/Roche.

Contributions: M.J.B., W.L.S., M.D., L.G., K.R.R., J.H., E.L., N.W., W.C., M.L., E.R., and  
S.H. designed the study; M.J.B. and W.L.S. chaired the clinical trial, analyzed the data and  
wrote the manuscript; M.D. and Y.D. analyzed the data, generated the tables and figures,  
reviewed and edited the manuscript; L.G., J.H., K.R.R., P.Z.M., M.B., B.W., N.H., A.C.,  
E.L., N.W., W.C., M.L., E.R., and S.H. analyzed the data, reviewed and edited the  
manuscript.
